# Supplementary material for: Alcohol, Coffee, and Milk Intake in Relation to Epilepsy Risk
Source: MDPI journal article supplement (doi:10.3390/nu14061153), 2022-03-09
Supplement: s1 [file s1]

**Supplementary Table S1.** Characteristics of the SNPs associated with alcohol consumption

| SNP        | Chr | effect_allele | other_allele | EAF  | beta     | se       | p         |
|------------|-----|---------------|--------------|------|----------|----------|-----------|
| rs705687   | 1   | G             | A            | 0.79 | -0.0109  | 0.001776 | 8.15E-10  |
| rs58107686 | 1   | A             | C            | 0.33 | -0.00975 | 0.001585 | 7.79E-10  |
| rs12088813 | 1   | C             | A            | 0.27 | -0.00933 | 0.001649 | 1.58E-08  |
| rs5024204  | 1   | T             | A            | 0.28 | 0.009703 | 0.001628 | 2.55E-09  |
| rs10753661 | 1   | A             | G            | 0.68 | -0.00864 | 0.001569 | 3.76E-08  |
| rs28680958 | 1   | A             | G            | 0.22 | -0.011   | 0.00177  | 5.13E-10  |
| rs823114   | 1   | A             | G            | 0.55 | 0.008768 | 0.001467 | 2.31E-09  |
| rs77165542 | 2   | T             | C            | 0.03 | -0.02601 | 0.003971 | 5.63E-11  |
| rs1260326  | 2   | C             | T            | 0.60 | 0.02089  | 0.001488 | 8.05E-45  |
| rs13383034 | 2   | T             | C            | 0.33 | 0.014927 | 0.001551 | 6.31E-22  |
| rs13032049 | 2   | G             | A            | 0.28 | 0.010195 | 0.001618 | 3E-10     |
| rs828867   | 2   | A             | G            | 0.55 | 0.008757 | 0.001464 | 2.15E-09  |
| rs11692435 | 2   | A             | G            | 0.09 | 0.01745  | 0.002616 | 2.53E-11  |
| rs13024996 | 2   | A             | C            | 0.36 | -0.01091 | 0.001515 | 5.72E-13  |
| rs72859280 | 2   | T             | G            | 0.04 | 0.022885 | 0.003902 | 4.44E-09  |
| rs56337305 | 2   | C             | T            | 0.38 | -0.00959 | 0.001499 | 1.63E-10  |
| rs13094887 | 3   | T             | A            | 0.30 | -0.01031 | 0.001589 | 8.57E-11  |
| rs62250685 | 3   | G             | A            | 0.61 | -0.01436 | 0.0015   | 1.05E-21  |
| rs13066454 | 3   | T             | C            | 0.40 | -0.00878 | 0.001492 | 4.13E-09  |
| rs9838144  | 3   | C             | G            | 0.21 | -0.00996 | 0.001793 | 2.65E-08  |
| rs2011092  | 3   | C             | T            | 0.34 | -0.0089  | 0.00154  | 7.35E-09  |
| rs6787172  | 3   | G             | T            | 0.55 | -0.00803 | 0.001466 | 4.27E-08  |
| rs3748034  | 4   | T             | G            | 0.14 | -0.01174 | 0.002082 | 1.67E-08  |
| rs11940694 | 4   | G             | A            | 0.60 | 0.02595  | 0.001486 | 3.03E-68  |
| rs4501255  | 4   | G             | C            | 0.24 | 0.010693 | 0.001719 | 4.83E-10  |
| rs1229984  | 4   | C             | T            | 0.96 | 0.150534 | 0.003861 | <2.2e-308 |
| rs36052336 | 4   | G             | A            | 0.06 | -0.01843 | 0.003034 | 1.23E-09  |
| rs2165670  | 4   | A             | G            | 0.11 | 0.02308  | 0.002364 | 1.67E-22  |
| rs79139602 | 4   | T             | A            | 0.02 | 0.060272 | 0.005076 | 1.8E-32   |
| rs4699791  | 4   | A             | G            | 0.10 | 0.018571 | 0.002477 | 6.58E-14  |
| rs13107325 | 4   | T             | C            | 0.07 | -0.0275  | 0.002816 | 1.53E-22  |
| rs4690727  | 4   | G             | C            | 0.72 | 0.010817 | 0.00162  | 2.43E-11  |
| rs12651313 | 4   | G             | C            | 0.44 | -0.00864 | 0.001467 | 3.79E-09  |
| rs4916723  | 5   | C             | A            | 0.42 | -0.00995 | 0.001479 | 1.72E-11  |
| rs12655091 | 5   | A             | G            | 0.53 | -0.00831 | 0.00146  | 1.25E-08  |
| rs55872084 | 5   | T             | G            | 0.24 | 0.009979 | 0.001719 | 6.32E-09  |
| rs6460047  | 7   | C             | T            | 0.21 | 0.011624 | 0.001796 | 9.69E-11  |
| rs10236149 | 7   | G             | A            | 0.12 | -0.0135  | 0.002219 | 1.18E-09  |
| rs35034355 | 7   | A             | G            | 0.52 | -0.0081  | 0.001459 | 2.87E-08  |
| rs6951574  | 7   | C             | T            | 0.46 | 0.013222 | 0.001463 | 1.58E-19  |
| rs13250583 | 8   | T             | C            | 0.21 | -0.00972 | 0.00178  | 4.7E-08   |
| rs1217091  | 8   | C             | T            | 0.81 | 0.012161 | 0.001865 | 7.05E-11  |
| rs28601761 | 8   | G             | C            | 0.42 | 0.009103 | 0.001477 | 7.17E-10  |
| rs55932213 | 9   | G             | A            | 0.74 | 0.009488 | 0.001654 | 9.55E-09  |
| rs10978550 | 9   | C             | T            | 0.21 | -0.01175 | 0.001802 | 7.15E-11  |
| rs7074871  | 10  | A             | G            | 0.26 | -0.0094  | 0.001672 | 1.86E-08  |
| rs17665139 | 10  | T             | C            | 0.15 | -0.01156 | 0.002047 | 1.59E-08  |
| rs7950166  | 11  | T             | C            | 0.64 | -0.0098  | 0.001516 | 9.89E-11  |
| rs11030084 | 11  | T             | C            | 0.18 | -0.01061 | 0.001881 | 1.72E-08  |
| rs56030824 | 11  | A             | G            | 0.32 | -0.0116  | 0.001563 | 1.15E-13  |
| rs10750025 | 11  | T             | C            | 0.69 | 0.010321 | 0.00157  | 4.89E-11  |

|            |    |   |   |      |          |          |          |
|------------|----|---|---|------|----------|----------|----------|
| rs1713676  | 11 | G | A | 0.52 | -0.00799 | 0.001459 | 4.29E-08 |
| rs4938230  | 11 | A | C | 0.84 | 0.01281  | 0.001998 | 1.48E-10 |
| rs682011   | 11 | C | T | 0.56 | 0.008212 | 0.001468 | 2.22E-08 |
| rs12795042 | 11 | C | A | 0.62 | -0.00832 | 0.001504 | 3.25E-08 |
| rs10876188 | 12 | T | C | 0.46 | -0.00799 | 0.001463 | 4.84E-08 |
| rs3809162  | 12 | G | A | 0.40 | 0.009061 | 0.00149  | 1.19E-09 |
| rs10506274 | 12 | T | G | 0.48 | -0.00904 | 0.001458 | 5.78E-10 |
| rs4842786  | 12 | A | G | 0.58 | -0.0088  | 0.001479 | 2.73E-09 |
| rs500321   | 13 | T | A | 0.74 | -0.00967 | 0.001653 | 4.92E-09 |
| rs1123285  | 14 | G | C | 0.34 | -0.0089  | 0.001544 | 8.14E-09 |
| rs2180870  | 14 | C | T | 0.14 | -0.01218 | 0.002133 | 1.12E-08 |
| rs28929474 | 14 | T | C | 0.02 | -0.0368  | 0.005438 | 1.34E-11 |
| rs11625650 | 14 | A | G | 0.23 | -0.00957 | 0.001724 | 2.89E-08 |
| rs2472297  | 15 | T | C | 0.25 | 0.010606 | 0.001685 | 3.1E-10  |
| rs12907323 | 15 | G | A | 0.41 | 0.008497 | 0.001481 | 9.93E-09 |
| rs2764771  | 16 | A | G | 0.31 | 0.009891 | 0.001582 | 4.02E-10 |
| rs17177078 | 16 | T | C | 0.06 | -0.02232 | 0.003012 | 1.27E-13 |
| rs378421   | 16 | A | G | 0.40 | -0.01121 | 0.001487 | 4.83E-14 |
| rs11344371 | 16 | A | G | 0.31 | -0.01021 | 0.001585 | 1.19E-10 |
| rs62044525 | 16 | G | C | 0.18 | -0.01217 | 0.001883 | 1.03E-10 |
| rs7185555  | 16 | C | G | 0.15 | -0.0111  | 0.002027 | 4.24E-08 |
| rs79616692 | 16 | C | G | 0.11 | 0.016302 | 0.002351 | 4.11E-12 |
| rs1104608  | 16 | C | G | 0.43 | -0.01097 | 0.001476 | 1.05E-13 |
| rs4548913  | 17 | A | G | 0.63 | -0.00836 | 0.001511 | 3.11E-08 |
| rs3803800  | 17 | G | A | 0.79 | 0.011379 | 0.001777 | 1.5E-10  |
| rs2854334  | 17 | G | A | 0.62 | 0.009221 | 0.001498 | 7.51E-10 |
| rs2532276  | 17 | A | C | 0.22 | -0.0218  | 0.002559 | 1.62E-17 |
| rs10438820 | 17 | T | C | 0.70 | 0.008972 | 0.001593 | 1.76E-08 |
| rs9950000  | 18 | T | C | 0.40 | -0.00912 | 0.001491 | 9.38E-10 |
| rs4092465  | 18 | G | A | 0.64 | -0.00829 | 0.001514 | 4.39E-08 |
| rs281379   | 19 | A | G | 0.51 | 0.013722 | 0.001458 | 4.91E-21 |
| rs4815364  | 20 | A | G | 0.62 | 0.008582 | 0.001499 | 1.02E-08 |
| rs9607814  | 22 | A | C | 0.20 | -0.01018 | 0.001859 | 4.31E-08 |

---

**Supplementary Table S2.** Characteristics of the SNPs associated with coffee consumption

| SNP        | Chr | effect_allele | other_allele | EAF  | beta | se   | p         |
|------------|-----|---------------|--------------|------|------|------|-----------|
| rs574367   | 1   | T             | G            | 0.21 | 1.05 | 0.18 | 8.06E-09  |
| rs10865548 | 2   | G             | A            | 0.83 | 1.54 | 0.19 | 4.46E-15  |
| rs1260326  | 2   | C             | T            | 0.61 | 1.36 | 0.15 | 2.62E-19  |
| rs1057868  | 7   | T             | C            | 0.29 | 1.97 | 0.16 | 5.26E-33  |
| rs34060476 | 7   | G             | A            | 0.13 | 1.89 | 0.22 | 5.06E-18  |
| rs4410790  | 7   | C             | T            | 0.63 | 3.94 | 0.15 | 5.59E-141 |
| rs73073176 | 7   | C             | T            | 0.87 | 2.31 | 0.22 | 5.56E-25  |
| rs597045   | 11  | A             | T            | 0.69 | 1.07 | 0.16 | 6.62E-11  |
| rs1956218  | 14  | G             | A            | 0.56 | 0.82 | 0.15 | 3.62E-08  |
| rs2472297  | 15  | T             | C            | 0.27 | 4.54 | 0.17 | 5.19E-155 |
| rs66723169 | 18  | A             | C            | 0.23 | 1.47 | 0.18 | 9.88E-17  |
| rs2330783  | 22  | G             | T            | 0.99 | 4.53 | 0.63 | 1.57E-12  |
